# Supplementary material for: RETRACTED: A Polysaccharide Isolated from the Herb Bletilla striata Combined with Methylcellulose to Form a Hydrogel via Self-Assembly as a Wound Dressing
Source: MDPI journal article supplement (doi:10.3390/ijms231912019), 2022-10-10
Supplement: s1 [file s1 › ijms-1923879 Supplementary File.pdf]

## Supplementary Data

### Antibacterial activity of the developed MB hydrogels, BSP, and MC against Gram-Negative

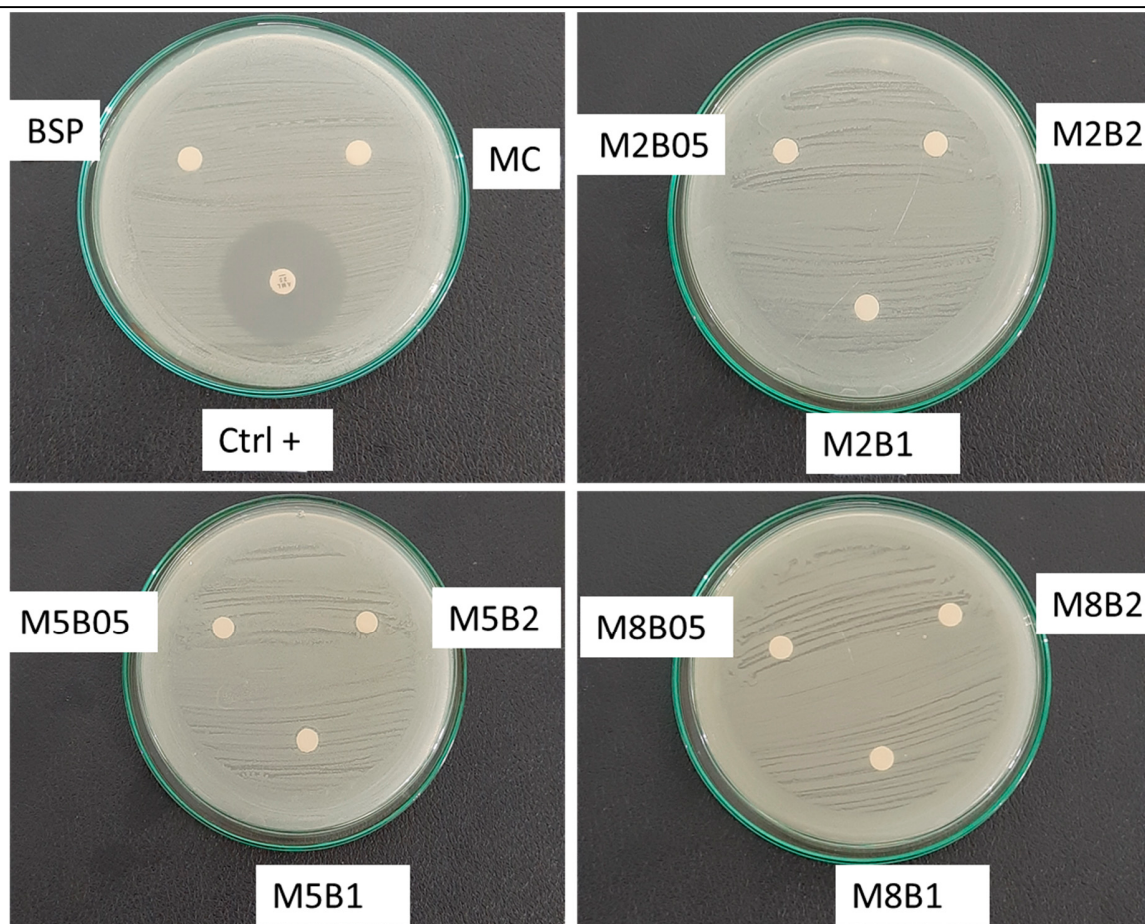

**Figure S1.** The agar disc diffusion assay of MC, BSP and developed MB hydrogels against *Staphylococcus aureus* ATCC 25923, and amoxicillin as positive control.

**Antibacterial activity of the developed MB hydrogels, BSP, and MC against Gram-Positive**

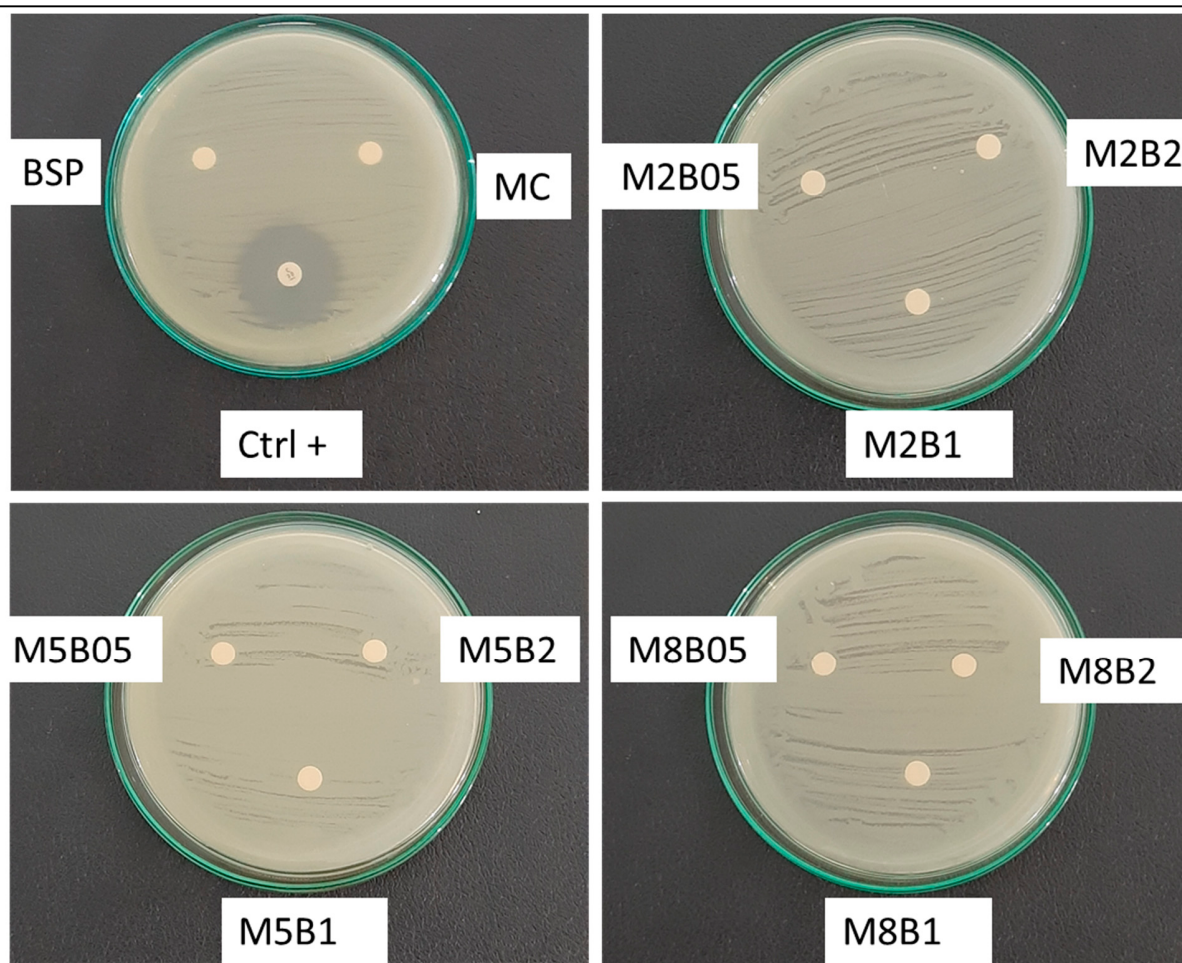

**Figure S2.** The agar disc diffusion assay of MC, BSP and developed MB hydrogels against *Escherichia coli* ATCC 25922, and chloramphenicol as positive control.
